# Supplementary material for: Adsorption and binding of capping molecules for highly luminescent CdSe nanocrystals – DFT simulation studies
Source: Royal Society of Chemistry journal article supplement (doi:10.1039/c0nr00569j), 2010-01-01
Supplement: c0nr00569j.pdf [file c0nr00569j.pdf]

## Absorption and Binding of Capping Molecules for Highly Luminescent CdSe Nanocrystals -

### DFT Simulation Studies

#### Supporting Information

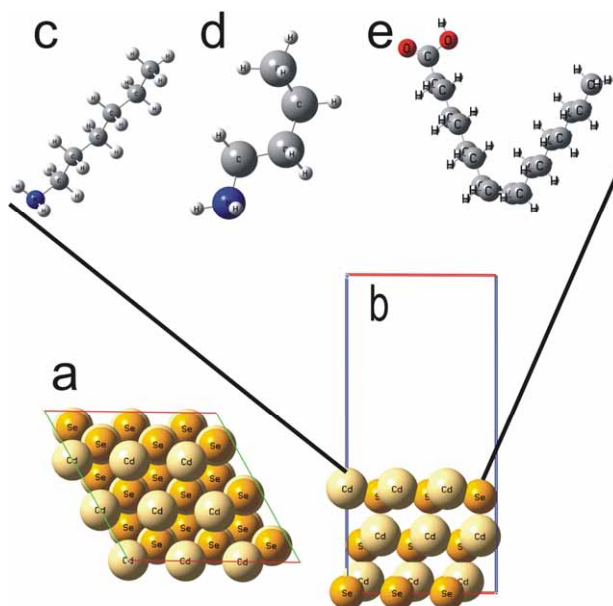

5 **Figure S1.** (a) Top view of the CdSe(111)  $3 \times 3$  surface; (b) Side view of the CdSe(111)  $3 \times 3$  slab; DFT optimized geometry of (c) HA; (d) BA; (e) OA molecule.

Density functional theory (DFT) and self-consistent periodic calculations were performed to elucidate the fundamental reasons behind the binding energy and charge analyses of CdSe with *n*-BA, *n*-HA and OA. The periodic slab model comprised a six-layer of CdSe, a  $3 \times 3$  surface supercell with dimensions  
10 of  $12.940 \times 12.940 \times 23.924 \text{ \AA}^3$ , separated by a vacuum space of  $14 \text{ \AA}$ . The adsorbed capping molecules in the top CdSe layer were allowed to fluctuate by a given perturbation, while CdSe atoms at the bottom layer remained fixed as the boundary condition. The system would gradually become relaxed to achieve a balanced state with convergent energy, when the forces on the relaxed atoms were less than  $0.001 \text{ eV/\AA}$ .

15
